# Supplementary material
Source: publisher figshare collection journal article supplement (https://gsajournals.figshare.com/ndownloader/files/15555008)
Supplement: Supplementary file 1 [file 15555008]

**SUPPLEMENTAL INFORMATION**

**SUPPLEMENTAL MATERIALS AND METHODS**

**PCR amplification and Sanger sequencing of “A”, “B”, and “C” regions in Figure 5.**

DNA was extracted from each isofemale (yakuba_S09_L24, yakuba_S01_L19, and yakuba_S01_L31) line using a standard ‘squish’ buffer protocol (Gloor *et al.* 1993). A standard PCR assay (Simpliamp ThermoCycler, Applied Biosystems, Singapore) was performed using the GoTaq™ DNA Polymerase (Promega™, Wisconsin, USA) master mix. PCR program began with 3 minutes at 94°C, followed by 34 cycles of 30 seconds at 94°C, 30 seconds at 55°C, and 1 minute and 15 seconds at 72°C. The profile finished with 8 minutes at 72°C. The amplified

PCR products were visualized on a 1% agarose gel that included a ladder.

We evaluated regions A, B, and C in Figure 5 using PCR and Sanger sequencing. This includes one primer set covering the A region, four primer sets attempting to cover the B region, and one primer set covering the C region (Table S1). We performed touchdown PCR with an annealing gradient from 70°C to 55°C, which provided the same results as the standard PCR conditions. In cases where no products were returned, we lowered the annealing temperature from 55°C to 50°C and repeated the PCR. PCR products from a focal genotype (yakuba_S09_L24) were cleaned using the QiaQuick PCR purification kit (Qiagen, Germany). We sent the cleaned PCR products to Eurofins (Kentucky) for Sanger sequencing. The loci, primers, and product lengths of PCR experiments are presented in Table S1.

**SUPPLEMENTAL TABLES**

| **Table S1.** Primers used in this study. | | | | |
| --- | --- | --- | --- | --- |
| **Locus/Target region** | **Primer name** | **Forward primer** | **Reverse primer** | **Reference** |
| *wsp: Wolbachia* surface protein | *wsp* | 5’TGGTCCAATAAGTGATGAAGAAAC-3’ | 5’AAAAATTAAACGCTACTCCA-3’ | Braig *et. al.* 1998 |
| *2L Control*: rDNA | *2L* | 5’TGCAGCTATGGTCGTTGACA-3’ | 5’ACGAGACAATAATATGTGGTGCTG-3’ | Meany *et al.* 2019 |
| YAK_***IS****Wpi1*, “A” in Figure 5§ | Bridge_5A | 5’TTTTTGTTCTCAGAGGTTGTCC-3’ | 5’GTTGCTGGAAATGGTTGGAT -3’ | Designed here |
| MEL_***IS****Wpi1*, “B” in Figure 5* | 433808_2_694583 | 5’GCTTACCAAGGCATGAATCC-3’ | 5’TGCTTATTTTTCTTGTGGTCCA-3’ | Designed here |
| MEL_***IS****Wpi1*, “B” in Figure 5* | 692607_2_433806 | 5’CCTCAGGTTCGAGTGACAATTT-3’ | 5’TAAGTTGTCTTCAATATGCCGC-3’ | Designed here |
| MEL_***IS****Wpi1*, “B” in Figure 5* | long_***IS****Wpi1* | 5’TCCCACTAGCCTCTCTATTCCA-3’ | 5’ATACCGCCATTGACACCCTG -3’ | Designed here |
| MEL_***IS****Wpi1*, “B” in Figure 5* | long_***IS****Wpi1*_rev | 5’CTGCTATTTCTCCCACTAGCCT-3’ | 5’GCACAAAGATACGCCACCTG-3’ | Designed here |
| YAK_CinB, “C” in Figure 5† | *cin*_region | 5’CCGCTTGAGTTGGTACAGCTT -3’ | 5’TTATCAGAACCGCGCACAAG-3’ | Designed here |

§Produced a 960 bp product

*Failed to amplify

†Produced a 1,006 bp product

| **Table S2.** The scaffold count, N50, and total assembly size of each *Wolbachia* pseudoreference. | | | |
| --- | --- | --- | --- |
| **Genome** | **Scaffold count** | **N50** | **Total assembly size** |
| *w*Yak | 118 | 17888 | 1.28 million bases |
| *w*San | 300 | 7231 | 1.18 million bases |
| *w*Tei | 122 | 16157 | 1.30 million bases |

| Table S3. Near-universal, single-copy proteobacteria genes used to assess assembly completeness. We used BUSCO v. 3.0.0 to identify complete and fragmented proteobacteria genes (out of 221) found in our draft *Wolbachia* genomes. For comparison, we provide results for reference-quality *Wolbachia* genomes. | | | |
| --- | --- | --- | --- |
| Genome | **Complete** | **Fragment** | **Not found** |
| Complete reference genomes | | | |
| *w*Ri | 180 | 2 | 39 |
| *w*Mel | 180 | 2 | 39 |
| *w*Au | 181 | 2 | 38 |
| *w*Ha | 179 | 3 | 39 |
| *w*No | 181 | 4 | 36 |
| Draft genome assemblies | | | |
| *w*Yak | 181 | 2 | 38 |
| *w*San | 181 | 2 | 38 |
| *w*Tei | 180 | 2 | 39 |

| Table S4. Rate multipliers for the *Wolbachia* relaxed-clock chronograms. All numbers are estimated from the (2,2) trees. They are the total estimated substitutions per site for that partition across the relevant clade (See Methods). | | | |
| --- | --- | --- | --- |
|  | **1st position**  (95% credible interval) | **2nd position**  (95% credible interval) | **3rd position**  (95% credible interval) |
| *D. yakuba-Wolbachia* | 1.9 × 10–5,  (9.6 × 10–6, 3.0 × 10–5) | 1.2 × 10–5,  (5.2 × 10–6, 1.9 × 10–5) | 1.7 × 10–5,  (8.5 × 10–6, 2.7 × 10–5) |
| *w*Mel | 4.4 × 10–5,  (2.2 × 10–5, 7.1 × 10–5) | 5.7 × 10–5,  (2.8 × 10–5, 9.2 × 10–5) | 3.4 × 10-5,  (1.5 × 10–5, 5.6 × 10–5) |
| *D. yakuba*- clade and *w*Mel *Wolbachia* | 1.7 ×10-4,  (1.1 × 10–4, 2.4 × 10–4) | 1.4 × 10–4,  (8.7 × 10–5, 1.9 × 10–4) | 2.0 × 10–4,  (1.2 × 10–4, 2.7 × 10–4) |

| Table S5. Divergence estimates and credible intervals for the *Wolbachia* relaxed-clock chronograms estimated from the (7,7) branch-rate prior. | | | | |
| --- | --- | --- | --- | --- |
| Relaxed-clock analysis | ***w*Mel-*w*Yak**  **divergence** | ***w*Yak-clade**  **divergence** | ***w*Mel-clade**  **divergence** | ***w*Yak-*w*San**  **divergence** |
| *D. yakuba-Wolbachia* | NA | 2642,  (781, 5904) | NA | 1545,  (401, 3680 |
| *w*Mel | NA | NA | 4955,  (1363, 11093) | NA |
| *D. yakuba*- clade and *w*Mel *Wolbachia* | 49585,  (17452, 106310) | 3914,  (1432, 9024) | 7908,  (2511, 18739) | 2252,  (740, 5229) |

**SUPPLEMENTAL FIGURES**


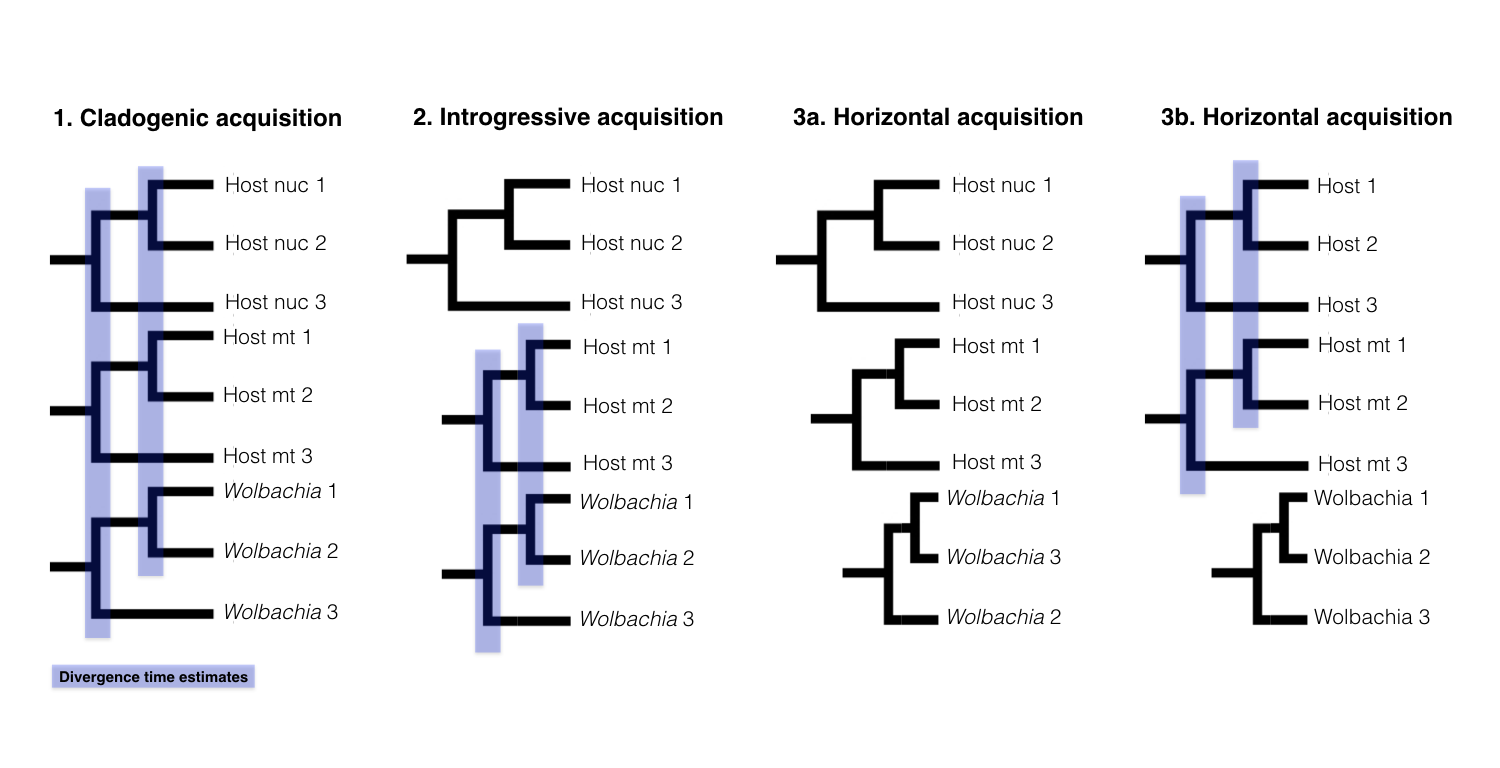


Figure S1 Phylogenetic hypotheses about *Wolbachia* acquisition. Infections could be 1) old and codiverging with host genomes (cladogenic acquisition), 2) codiverging with mtDNA (mt) with both mtDNA and *Wolbachia* having more recent divergence times than host nuclear genomes due to a history of host hybridization (introgressive acquisition), or 3) relatively young with more recent divergence times than host genomes (horizontal acquisition). For introgressive acquisition, mitochondrial and *Wolbachia* topologies could be discordant with the host nuclear topology. For horizontal acquisition, *Wolbachia* genomes could be discordant (3a) or concordant (3b) with host genomes. *Wolbachia* could be acquired horizontally by hosts with a history of hybridization introgression (3a) or by hosts with no history of hybridization and introgression (3b). Note that *Wolbachia* topologies could be concordant or discordant with host genomes in either case of horizontal acquisition.


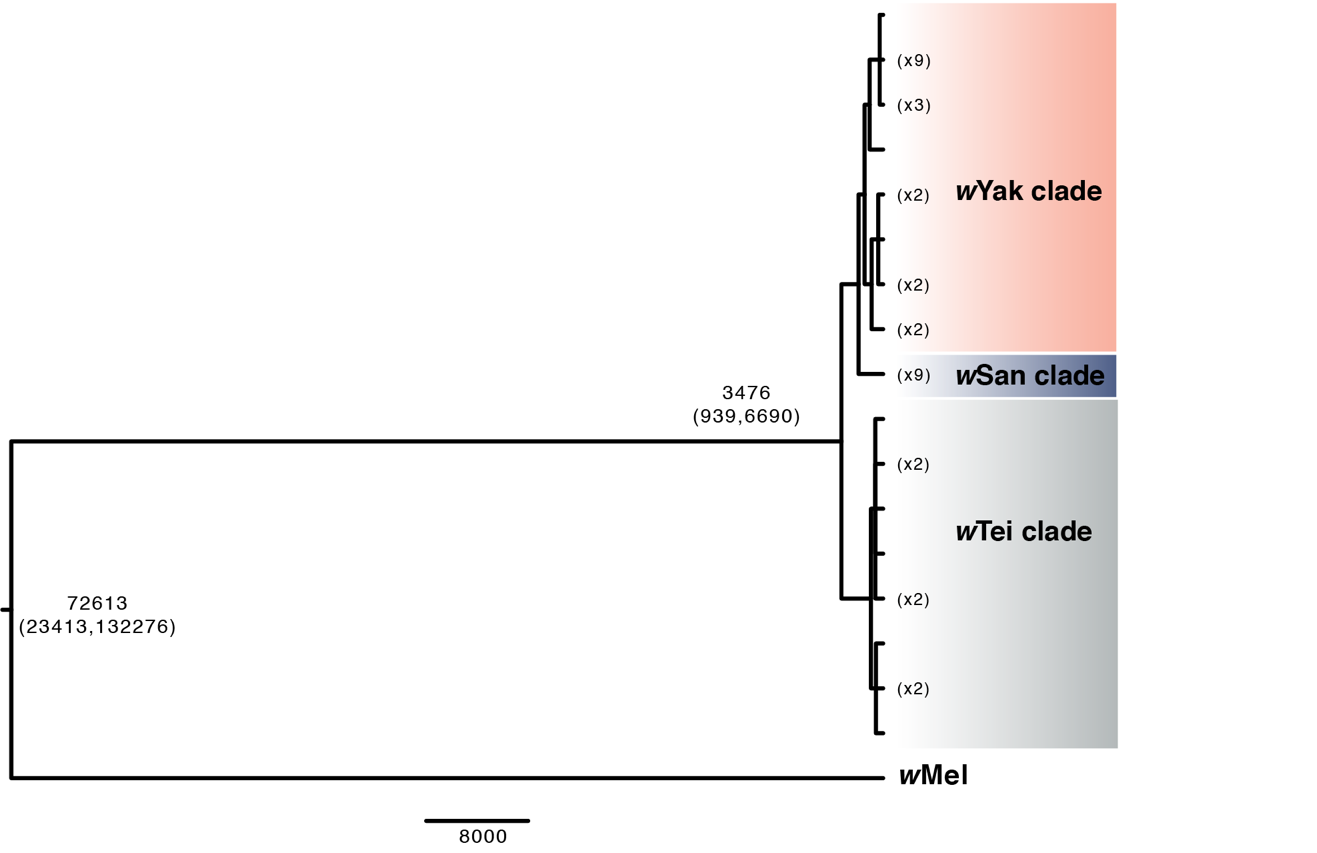


Figure S2 A Bayesian strict-clock *Wolbachia*absolute chronogram using 621 genes containing a total of 624,438 bp. Nodes with posterior probability less than 0.95 were collapsed into polytomies. Key nodes are labeled with age estimates.


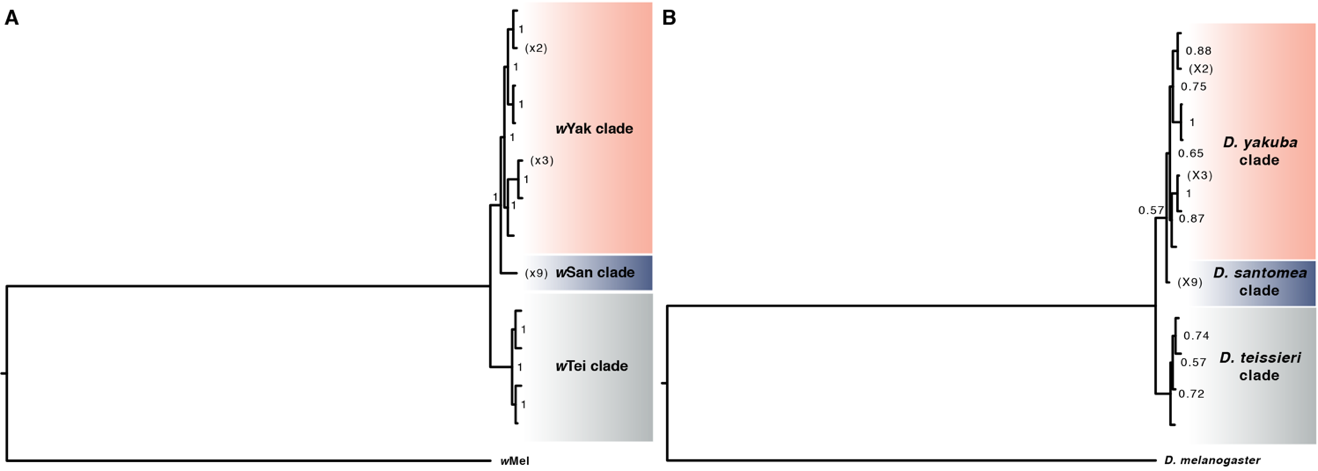


Figure S3 A. Bayesian *Wolbachia* phylogram using 621 genes containing a total of 624,438 bp. B. Bayesian mtDNA chronogram using the thirteen protein-coding genes. Nodes are labeled with their posterior probability.


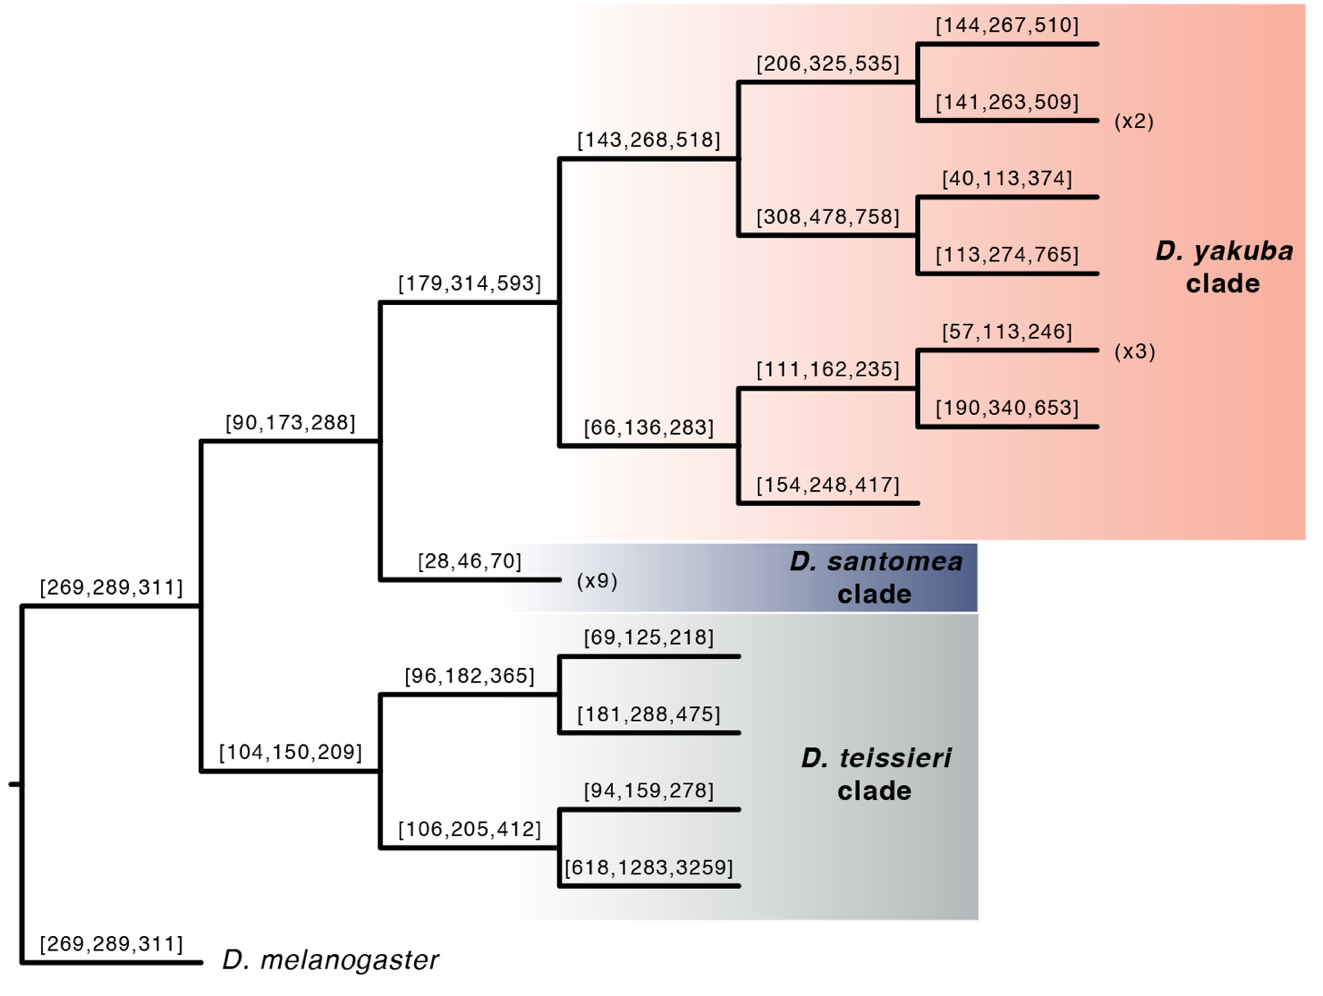


Figure S4 A Bayesian phylogram with all branches fixed to length 1. The topology is the consensus of the mitochondrial and *Wolbachia* phylograms. Branches are labeled with the quartiles of the posterior distribution of ratios of the substitution rates of mtDNA versus *Wolbachia* along the branch (see Methods).
